# Supplementary material
Source: PubMed Central journal article supplement (PMC4159665)
Supplement: supp_M114.040287_mcp.M114.040287-1.pdf [file supp_M114.040287_mcp.M114.040287-1.pdf]

| <b>Lysine</b> | <b>Heavy Isotopes</b>                        | <b>Abbreviation</b> | <b>Mass (Da)</b> |
|---------------|----------------------------------------------|---------------------|------------------|
| light         | $^{13}\text{C}_0^2\text{H}_0^{15}\text{N}_0$ | K <sub>000</sub>    | 146.1055         |
| medium        | $^{13}\text{C}_0^2\text{H}_4^{15}\text{N}_0$ | K <sub>040</sub>    | 150.1306         |
| heavy 1       | $^{13}\text{C}_6^2\text{H}_0^{15}\text{N}_2$ | K <sub>602</sub>    | 154.1197         |
| heavy 2       | $^{13}\text{C}_4^2\text{H}_2^{15}\text{N}_2$ | K <sub>422</sub>    | 154.1255         |
| heavy 3       | $^{13}\text{C}_5^2\text{H}_2^{15}\text{N}_1$ | K <sub>521</sub>    | 154.1319         |
| heavy 4       | $^{13}\text{C}_3^2\text{H}_4^{15}\text{N}_1$ | K <sub>341</sub>    | 154.1377         |
| heavy 5       | $^{13}\text{C}_4^2\text{H}_4^{15}\text{N}_0$ | K <sub>440</sub>    | 154.1440         |
| heavy 6       | $^{13}\text{C}_0^2\text{H}_8^{15}\text{N}_0$ | K <sub>080</sub>    | 154.1557         |

**Supplemental Table 1.** Lysine variants used in these experiments.
