# Supplementary material
Source: PubMed Central journal article supplement (PMC4159665)
Supplement: supp_M114.040287_mcp.M114.040287-2.pdf [file supp_M114.040287_mcp.M114.040287-2.pdf]

| <b>Category</b>                              | <b>NeuCode</b> | <b>TMT</b> |
|----------------------------------------------|----------------|------------|
| MS/MS scans                                  | 359,206        | 255,099    |
| PSMs                                         | 94,516         | 45,327     |
| Peptides (1% FDR)                            | 37,097         | 30,764     |
| Quantified peptides                          | 24,050         | 30,400     |
| Protein groups (1% FDR)                      | 4,466          | 4,008      |
| Quantified protein groups                    | 4,098          | 4,005      |
| Quantified protein groups $\geq 1.5x$ change | 392            | 224        |

**Supplemental Table 2.** Results for NeuCode SILAC- and TMT-based quantification of the yeast proteome under salt stress.
