# Supplementary material
Source: PubMed Central journal article supplement (PMC4159665)
Supplement: supp_M114.040287_mcp.M114.040287-3.pdf [file supp_M114.040287_mcp.M114.040287-3.pdf]

| <b><i>S. cerevisiae</i> strain name</b> | <b>Genotype</b>                                                                                                                                          | <b>Source or reference</b>            |
|-----------------------------------------|----------------------------------------------------------------------------------------------------------------------------------------------------------|---------------------------------------|
| BY4741                                  | MAT $\alpha$ , <i>his3<math>\Delta</math>1</i> , <i>leu2<math>\Delta</math>0</i> ,<br><i>met15<math>\Delta</math>0</i> , <i>ura3<math>\Delta</math>0</i> | Brachmann <i>et al.</i> <sup>23</sup> |
| BY4742                                  | MAT $\alpha$ , <i>his3<math>\Delta</math>1</i> , <i>leu2<math>\Delta</math>0</i> ,<br><i>lys2<math>\Delta</math>0</i> , <i>ura3<math>\Delta</math>0</i>  | Brachmann <i>et al.</i> <sup>23</sup> |
| AGY 0260                                | BY4741-<br><i>hog1<math>\Delta</math>::KANMX</i>                                                                                                         | Giaever <i>et al.</i> <sup>24</sup>   |
| AGY 0594                                | BY4741-<br><i>dot6<math>\Delta</math>::KANMX</i> ,<br><i>tod6<math>\Delta</math>::HYGMX</i>                                                              | Lee <i>et al.</i> <sup>25</sup>       |
| AGY 0863                                | <i>hog1<math>\Delta</math>::KANMX</i> ,<br><i>lys2<math>\Delta</math>0</i> , MAT $\alpha$                                                                | This study                            |
| AGY 0864                                | BY4742-<br><i>his3<math>\Delta</math>::KANMX</i>                                                                                                         | Giaever <i>et al.</i> <sup>24</sup>   |
| AGY 0865                                | <i>dot6<math>\Delta</math>::KANMX</i> ,<br><i>tod6<math>\Delta</math>::HYGMX</i> ,<br><i>lys2<math>\Delta</math>0</i> , MAT $\alpha$                     | This study                            |
| AGY 0866                                | BY4742-<br><i>rck2<math>\Delta</math>::KANMX</i>                                                                                                         | Giaever <i>et al.</i> <sup>24</sup>   |
| AGY 0867                                | BY4742-<br><i>cka2<math>\Delta</math>::KANMX</i>                                                                                                         | Giaever <i>et al.</i> <sup>24</sup>   |
| AGY 0877                                | BY4742-<br><i>sto1<math>\Delta</math>::KANMX</i>                                                                                                         | Giaever <i>et al.</i> <sup>24</sup>   |

**Supplemental Table 3.** Yeast strains.
