# Supplementary material
Source: PubMed Central journal article supplement (PMC4159665)
Supplement: supp_M114.040287_mcp.M114.040287-4.pdf [file supp_M114.040287_mcp.M114.040287-4.pdf]

| <b>Time (min)</b> | <b><i>cka2Δ</i></b> | <b><i>hog1Δ</i></b> | <b><i>sto1Δ</i></b> | <b><i>rck2Δ</i></b> | <b><i>dot6Δtod6Δ</i></b> |
|-------------------|---------------------|---------------------|---------------------|---------------------|--------------------------|
| 0                 | 69 (11.4%)          | 60 (10.0%)          | 105 (17.4%)         | 50 (8.3%)           | 76 (12.6%)               |
| 60                | 49 (8.1%)           | 109 (18.1%)         | 90 (14.9%)          | 40 (6.6%)           | 64 (10.6%)               |
| 240               | 45 (7.5%)           | 89 (14.8%)          | 112 (18.6%)         | 44 (7.2%)           | 80 (13.3%)               |

**Supplemental Table 4.** Proteins differentially expressed (greater than two-fold) across five mutant yeast strains in untreated and salt-treated cells.
