# Supplementary material
Source: PubMed Central journal article supplement (PMC4159665)
Supplement: supp_M114.040287_mcp.M114.040287-5.pdf [file supp_M114.040287_mcp.M114.040287-5.pdf]

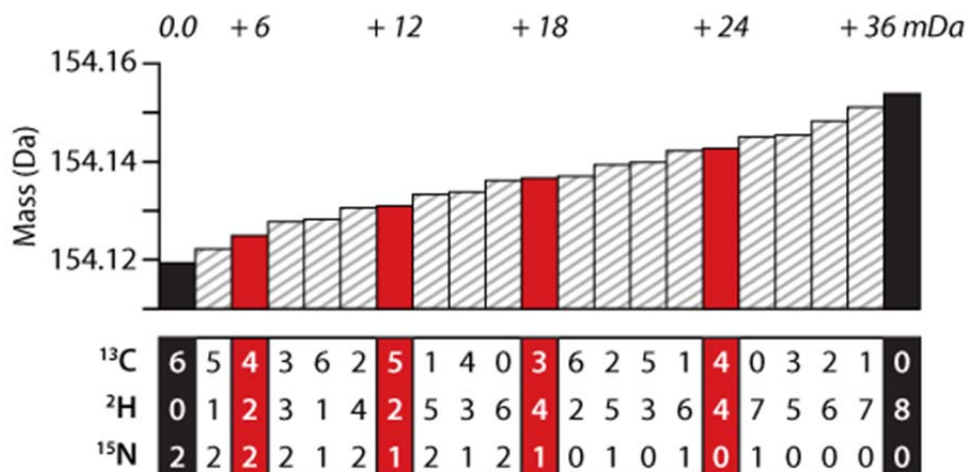

**Supplemental Figure 1.** Theoretical mass calculations of the 21 isotopologues for an M+8 lysine amino acid. Shown in solid black are the isotopologues that are commercially available. Shown in red are the novel isotopologues synthesized for the experiments presented here.
