# Supplementary material
Source: PubMed Central journal article supplement (PMC4159665)
Supplement: supp_M114.040287_mcp.M114.040287-6.pdf [file supp_M114.040287_mcp.M114.040287-6.pdf]

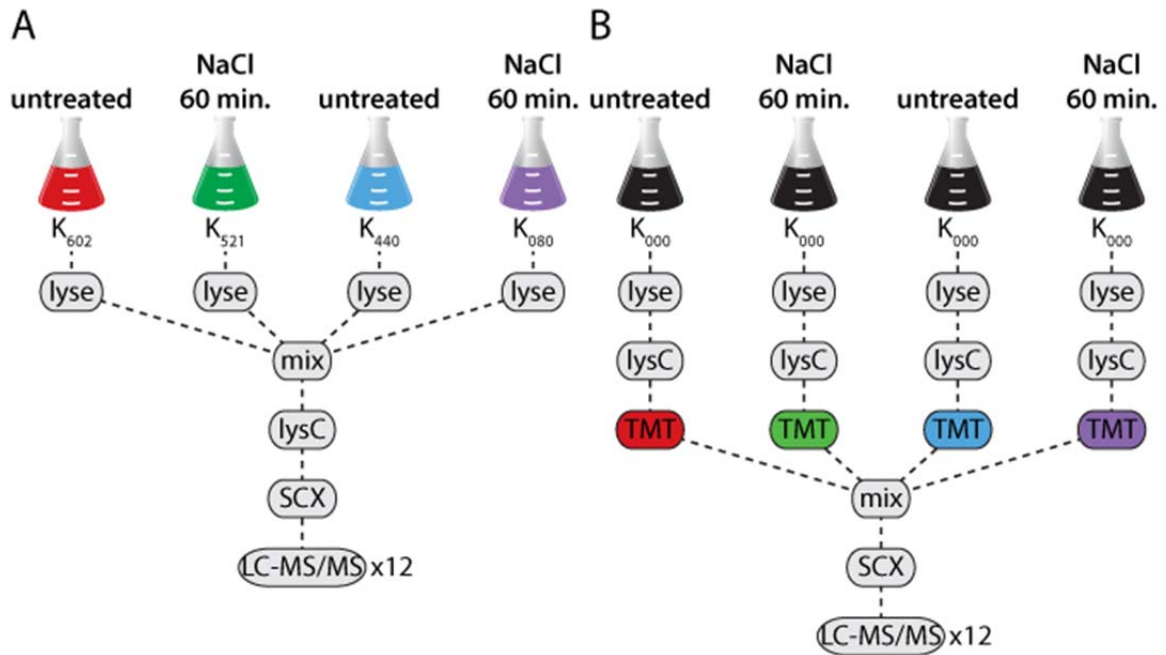

**Supplemental Figure 2.** Four-plex (a) NeuCode SILAC and (b) TMT workflows for yeast salt stress experiments.
