# Supplementary material
Source: PubMed Central journal article supplement (PMC4159665)
Supplement: supp_M114.040287_mcp.M114.040287-7.pdf [file supp_M114.040287_mcp.M114.040287-7.pdf]

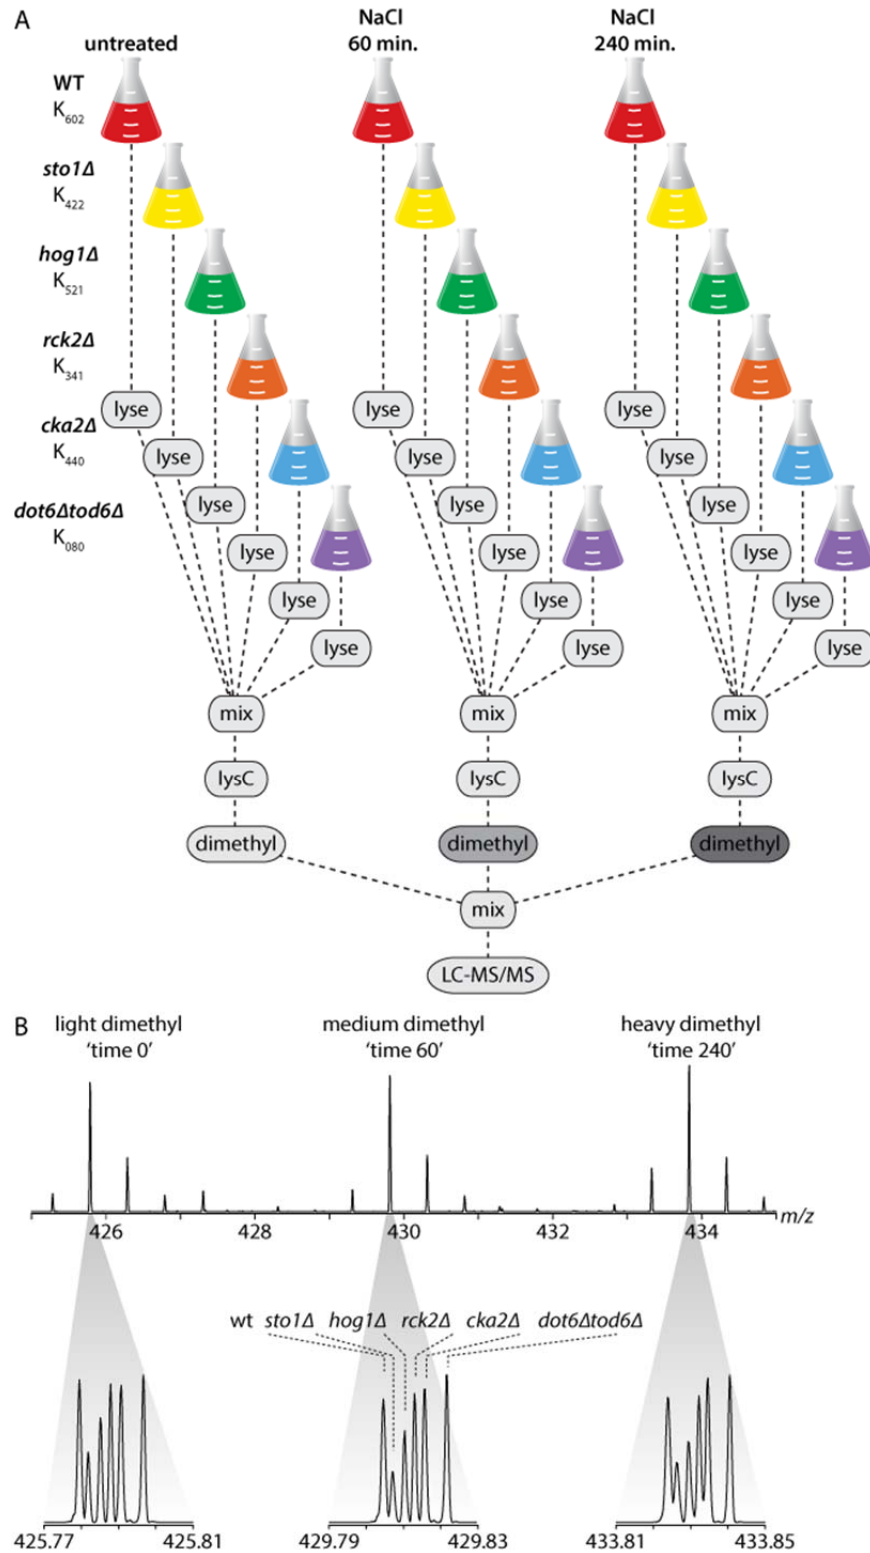

**Supplemental Figure 3.** 18-plex NeuCode SILAC for expanded yeast salt stress experiments. (a) Experimental workflow. (b) Dimethyl labeling creates a maximum of three isotopic clusters (i.e., time points). NeuCode SILAC labeling creates a maximum of six isotopologue peaks (i.e., strains) within each isotopic cluster.
